# Supplementary material for: Developing a model to predict individualised treatment for gonorrhoea: a modelling study
Source: HighWire-hosted journal article supplement (doi:10.1136/bmjopen-2020-042893), 2021-06-01
Supplement: bmjopen-2020-042893supp002_data_supplement.pdf [file bmjopen-2020-042893supp002_data_supplement.pdf]

## Supplementary Tables

Table A1

|                            | Previous gonorrhoea | Gender | Sexual orientation | Number of partners | Age    | Ethnic group |
|----------------------------|---------------------|--------|--------------------|--------------------|--------|--------------|
| <b>Previous gonorrhoea</b> | 1                   |        |                    |                    |        |              |
| <b>Gender</b>              | 0.125               | 1      |                    |                    |        |              |
| <b>Sexual orientation</b>  | 0.2296              | 0.5669 | 1                  |                    |        |              |
| <b>Number of partners</b>  | 0.1303              | 0.0554 | 0.0961             | 1                  |        |              |
| <b>Age</b>                 | 0.1121              | 0.2761 | 0.2682             | 0.0563             | 1      |              |
| <b>Ethnic group</b>        | 0.0335              | 0.0713 | 0.2554             | 0.0322             | 0.1217 | 1            |

Table A1: Correlation between the different variables included in the model and between the variable for previous gonorrhoea. Gender = male or female. Sexual orientation = heterosexual or homosexual/bisexual. Number of partners is defined as partners within the previous three months. Ethnic group = white ethnicity or other ethnicity.

Table A2

| Anatomical specimen site | n            | %          |
|--------------------------|--------------|------------|
| Urethral                 | 2,309        | 27.18      |
| Cervical                 | 475          | 5.59       |
| Rectal                   | 1,633        | 19.23      |
| Throat                   | 588          | 6.92       |
| High Vaginal Site        | 32           | 0.38       |
| Other                    | 11           | 0.13       |
| Unknown                  | 100          | 1.18       |
| Missing                  | 3,346        | 39.39      |
| <b>Total</b>             | <b>8,494</b> | <b>100</b> |

Table A2: Number and proportion of samples from each site of origin across the dataset.

Table A3

| PHE region                   | n            | %          |
|------------------------------|--------------|------------|
| London                       | 1,676        | 19.73      |
| Midlands and East of England | 584          | 6.88       |
| North of England             | 477          | 5.62       |
| South of England             | 359          | 4.23       |
| Missing                      | 5,398        | 63.55      |
| <b>Total</b>                 | <b>8,494</b> | <b>100</b> |

Table A3: Number and proportion of samples from each Public Health England (PHE) region across the dataset.
